# Supplementary material for: Liquid Biopsy as Surrogate for Tissue for Molecular Profiling in Pancreatic Cancer: A Meta-Analysis Towards Precision Medicine
Source: PubMed Central journal article supplement (PMC6721631; doi:10.3390/cancers11081152), 2019-08-10
Supplement: cancers-11-01152-s001.pdf [file cancers-11-01152-s001.pdf]

Supplementary Materials

# Liquid Biopsy as Surrogate for Tissue for Molecular Profiling in Pancreatic Cancer: A Meta-Analysis Towards Precision Medicine

Claudio Luchini, Nicola Veronese, Alessia Nottegar, Vera Cappelletti, Maria G. Daidone, Lee Smith, Christopher Parris, Lodewijk A. A. Brosens, Maria G. Caruso, Liang Cheng, Christopher L. Wolfgang, Laura D. Wood, Michele Milella, Roberto Salvia and Aldo Scarpa

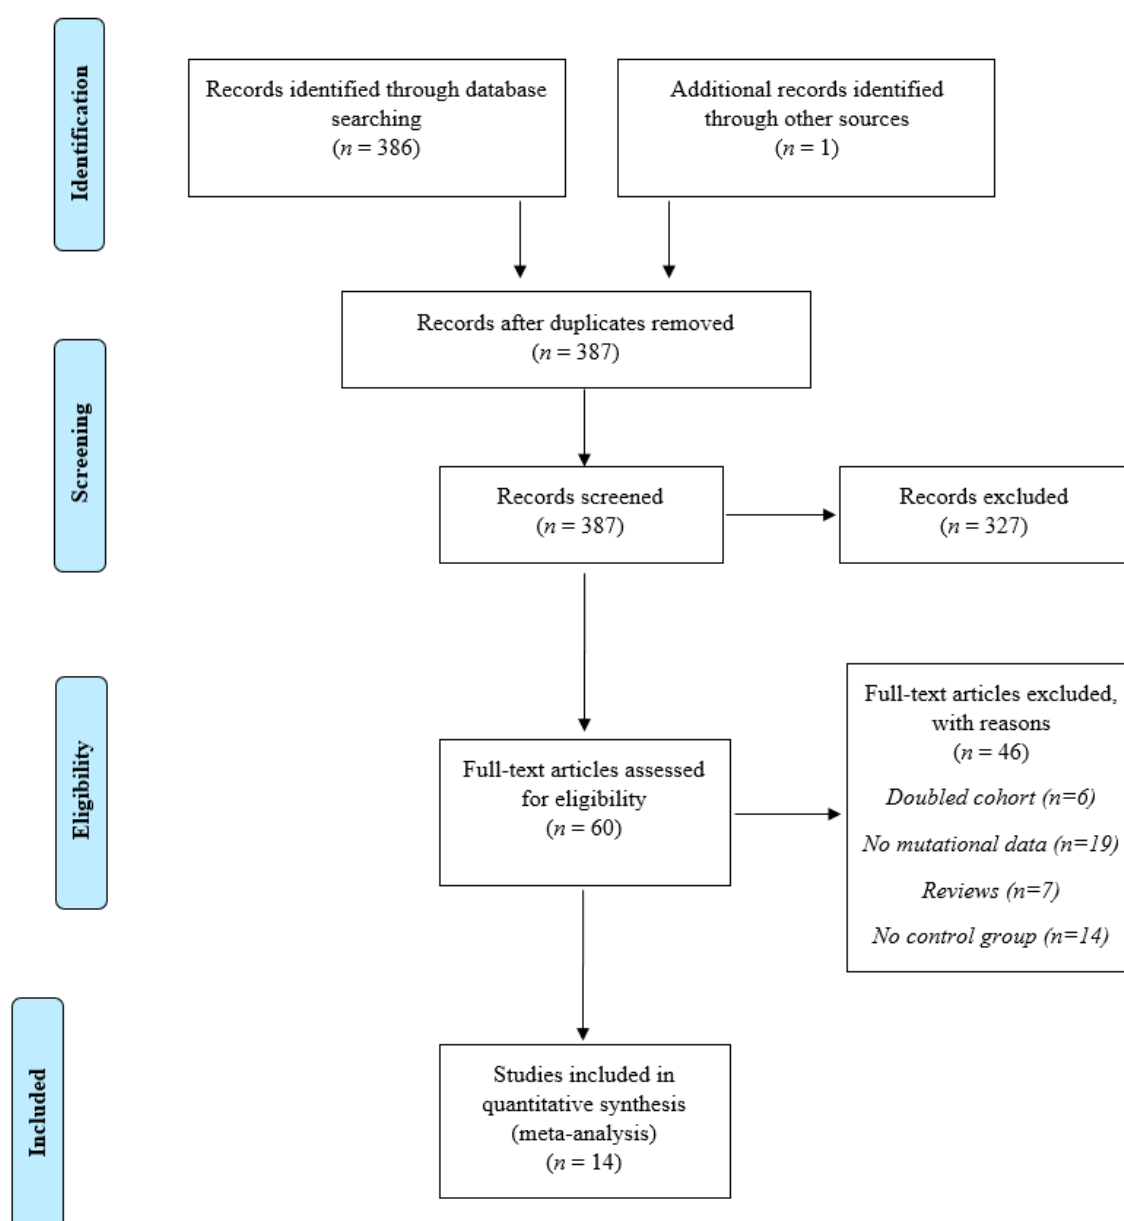

Figure S1. PRISMA checklist for this meta-analysis.

**Table S1.** QUADAS-2 tool: Risk of bias and applicability judgments of the present meta-analysis.

| Study           | Risk of Bias       |            |                    |                 | Applicability Judgments |            |                    |
|-----------------|--------------------|------------|--------------------|-----------------|-------------------------|------------|--------------------|
|                 | Patients Selection | Index Test | Reference Standard | Flow and Timing | Patients Selection      | Index Test | Reference Standard |
| Ako, 2017       | +                  | +          | +                  | +               | +                       | +          | +                  |
| Bernard, 2019   | +                  | +          | +                  | +               | +                       | +          | +                  |
| Brychta, 2016   | +                  | +          | +                  | +               | +                       | +          | +                  |
| Earl, 2015      | +                  | +          | +                  | +               | +                       | +          | +                  |
| Kinugasa, 2015  | +                  | +          | +                  | +               | +                       | +          | +                  |
| Kulemann, 2016  | +                  | +          | +                  | -               | +                       | +          | +                  |
| Marchese, 2006  | +                  | +          | +                  | +               | +                       | +          | +                  |
| Park, 2018      | +                  | +          | +                  | +               | +                       | +          | +                  |
| Pishvaian, 2017 | +                  | +          | +                  | -               | +                       | +          | +                  |
| Sefrioui, 2017  | +                  | +          | +                  | +               | +                       | +          | +                  |
| Shibata, 1998   | +                  | +          | +                  | +               | +                       | +          | +                  |
| Vietsch, 2018   | +                  | +          | +                  | -               | +                       | +          | +                  |
| Wu, 2014        | +                  | +          | +                  | +               | +                       | +          | +                  |
| Zill, 2015      | +                  | +          | +                  | +               | +                       | +          | +                  |

**Table S2.** Data considering the mutational status of *KRAS* gene only.

| <b>First Author of the Study, Year</b> | <b>N. of Patients</b> | <b>TP</b>  | <b>FP</b> | <b>TN</b> | <b>FN</b>  |
|----------------------------------------|-----------------------|------------|-----------|-----------|------------|
| Ako, 2017                              | 40                    | 19         | 0         | 3         | 18         |
| Bernard, 2019                          | 34                    | 20         | 1         | 11        | 2          |
| Brychta, 2016                          | 50                    | 13         | 0         | 14        | 23         |
| Earl, 2015                             | 12                    | 3          | 3         | 2         | 4          |
| Kinugasa, 2015                         | 75                    | 43         | 4         | 15        | 13         |
| Kulemann, 2016                         | 11                    | 5          | 0         | 0         | 6          |
| Marchese, 2006                         | 30                    | 0          | 0         | 9         | 21         |
| Park, 2018 <sup>a</sup>                | 17                    | 10         | 0         | 4         | 3          |
| Pishvaian, 2017 <sup>a*</sup>          | 16                    | 4          | 0         | 2         | 10         |
| Sefrioui, 2017                         | 27                    | 14         | 3         | 5         | 5          |
| Shibata, 1998                          | 3                     | 3          | 0         | 0         | 0          |
| Vietsch, 2018 <sup>a*</sup>            | 5                     | 0          | 0         | 0         | 5          |
| Wu, 2014                               | 36                    | 26         | 0         | 10        | 0          |
| Zill, 2015                             | 13                    | 9          | 0         | 3         | 1          |
| <b>Total</b>                           | <b>369</b>            | <b>169</b> | <b>11</b> | <b>78</b> | <b>111</b> |

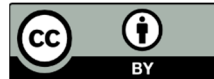

© 2019 by the authors. Licensee MDPI, Basel, Switzerland. This article is an open access article distributed under the terms and conditions of the Creative Commons Attribution (CC BY) license (<http://creativecommons.org/licenses/by/4.0/>).
